# Supplementary material for: Benchmarking DNA Foundation Models for Genomic Sequence Classification
Source: PubMed Central journal article supplement — bioRxiv. 2024 Aug 18:2024.08.16.608288. Preprint. [Version 1] doi: 10.1101/2024.08.16.608288 (PMC11343214; doi:10.1101/2024.08.16.608288), 2024-08-18
Supplement: media-1.pdf [file media-1.pdf]

## Supplementary Information: Dataset naming

We have collected four genomic classification tasks including 17 datasets. We named the datasets in a manner that clearly shows their features. Specifically:

For the **4mC sites detection in multiple species** task, we named the six datasets as: A.Thaliana 4mC, C.Elegans 4mC, D.Melanogaster 4mC, E.Coli 4mC, G.Pickeringii 4mC, G.Subterraneus 4mC.

For the **DNase-I hypersensitive sites detection** task, we named the one dataset as DNase\_I Hypersensitive.

For the **5mC and 6mA modifications detection** task, we named the two datasets as: 5-methylcytosin (5mC), N6-methyladenosine (6mA)

For the **Promoter identification in multiple species** task, we named the eight datasets as: Promoter GM12878, Promoter HUVEC, Promoter Hela-S3, Promoter NHEK, Promoter B\_ amyloliquefaciens, Promoter R\_capsulatus, Promoter Arabidopsis NonTATA, Promoter Arabidopsis TATA.

Besides, we have renamed the datasets adopted from DNABERT-2, NT-v2, and HyenaDNA in our study for better overall clarity. This document provides a mapping between the original dataset names and the nomenclature in our study. It can serve as a reference for tracing back to the original dataset sources.

### 1. Datasets adopted from DNABERT-2

Detailed descriptions of these datasets can be found in the original DNABERT-2 publication.

| <b>Our Dataset Naming</b>                                                                                       | <b>Original Reference</b>                            |
|-----------------------------------------------------------------------------------------------------------------|------------------------------------------------------|
| Promoter NonTATA 300 bps<br>Promoter TATA 300 bps<br>Promoter All 300 bps                                       | Promoter detection (Human)                           |
| Promoter NonTATA 70 bps<br>Promoter TATA 70 bps<br>Promoter All 70 bps                                          | Core promoter detection (Human)                      |
| Human TFBS 1<br>Human TFBS 2<br>Human TFBS 3<br>Human TFBS 4<br>Human TFBS 5                                    | Transcription factor binding site prediction (Human) |
| Mouse TFBS 1<br>Mouse TFBS 2<br>Mouse TFBS 3<br>Mouse TFBS 4<br>Mouse TFBS 5                                    | Transcription factor binding site prediction (Mouse) |
| Yeast H3<br>Yeast H3K79me3<br>Yeast H3K9ac<br>Yeast H3K14ac<br>Yeast H3K4me3<br>Yeast H3K36me3<br>Yeast H3K4me2 | Epigenetic marks prediction (Yeast)                  |

|                                         |                                  |
|-----------------------------------------|----------------------------------|
| Yeast H4<br>Yeast H3K4me1<br>Yeast H4ac |                                  |
| Covid variants                          | Covid variant prediction (Virus) |
| Splice Site Type DNABERT                | Splice site prediction (Human)   |

## 2. Datasets adopted from NT-v2

Detailed descriptions can be found in the corresponding sections of the original NT-v2 publication.

| <b>Our Dataset Naming</b>                  | <b>Original Reference</b>                   |
|--------------------------------------------|---------------------------------------------|
| Enhancer<br>Enhancer strength              | Enhancer sequence prediction, Section A 4.3 |
| Splice Site Type NT<br>Donors<br>Acceptors | Splice site prediction, Section A 4.4       |

## 3. Datasets adopted from HyenaDNA

Detailed descriptions of these datasets can be found in the original DNABERT-2 publication.

| <b>Our Dataset Naming</b> | <b>Original Reference</b> |
|---------------------------|---------------------------|
| Enhancer ensembl          | Human Enhancers Ensembl   |
| Promoter NonTATA 251bps   | Human Nontata Promoters   |
| Human vs worm             | Human vs worm             |
| Regulatory region type    | Human Regulatory          |
| Open chromatin region     | Human OCR Ensembl         |
| Coding                    | Coding vs Intergenic      |
| Enhancer cohn             | Human Enhancers Cohn      |

## Supplementary Tables and Figures

Supplementary Table 1: Details of each model. The bolded ones are the selected configurations in this study.

| Model Configuration      | Number of Parameters | Output Embedding Dimension |
|--------------------------|----------------------|----------------------------|
| <b>DNABERT-2</b>         | 117M                 | 768                        |
| NT-v2-50m                | 50M                  | 512                        |
| NT-v2-100m               | 100M                 | 512                        |
| NT-v2-250m               | 250M                 | 768                        |
| <b>NT-v2-500m</b>        | 500M                 | 1024                       |
| Hyena-tiny-1k            | 436K                 | 128                        |
| Hyena-tiny-1k-d256       | 436K                 | 256                        |
| Hyena-tiny-16k-d128      | 436K                 | 128                        |
| Hyena-small-32k          | 3M                   | 256                        |
| <b>Hyena-medium-160k</b> | 6M                   | 256                        |
| Hyena-medium-450k        | 6M                   | 256                        |
| Hyena-large-1m           | 6M                   | 256                        |

Supplementary Table 2: Details of each dataset.

| Data                          | Training Size | Testing Size | Maximum Length | Median Length |
|-------------------------------|---------------|--------------|----------------|---------------|
| 4mC_E.coli                    | 8681          | 3721         | 41             | 41            |
| 4mC_C.elegans                 | 84926         | 36398        | 41             | 41            |
| 4mC_G.pickeringii             | 24053         | 10309        | 41             | 41            |
| 4mC_G.subterraneus            | 63567         | 27243        | 41             | 41            |
| 4mC_D.melanogaster            | 126466        | 54200        | 41             | 41            |
| 4mC_A.thaliana                | 156697        | 67157        | 41             | 41            |
| DNase_I                       | 711           | 306          | 275            | 243           |
| 5-methylcytosin (5mC)         | 2344          | 2344         | 41             | 41            |
| N6-methyladenosine (6mA)      | 18336         | 18334        | 41             | 41            |
| Promoter GM12878              | 10992         | 2750         | 2999           | 1622          |
| Promoter R_capsulatus         | 7406          | 3175         | 40             | 40            |
| Promoter Arabidopsis_TATA     | 3063          | 1313         | 251            | 251           |
| Promoter NHEK                 | 8170          | 2044         | 2400           | 400           |
| Promoter Arabidopsis_NonTATA  | 8267          | 3543         | 251            | 251           |
| HUVEC                         | 11928         | 2982         | 2997           | 1267          |
| Promoter B_ amyloliquefaciens | 1483          | 636          | 40             | 40            |
| Promoter HeLa-S3              | 11736         | 2936         | 2999           | 1113          |
| Mouse TFBS 1                  | 6478          | 810          | 101            | 101           |

|                           |        |       |     |     |
|---------------------------|--------|-------|-----|-----|
| Mouse TFBS 2              | 53952  | 6745  | 101 | 101 |
| Mouse TFBS 3              | 2620   | 328   | 101 | 101 |
| Mouse TFBS 4              | 1904   | 239   | 101 | 101 |
| Mouse TFBS 5              | 15064  | 1883  | 101 | 101 |
| Promoter NonTATA 70 bps   | 42452  | 5307  | 300 | 300 |
| Promoter TATA 70 bps      | 42452  | 5307  | 70  | 70  |
| Promoter All 70 bps       | 4904   | 613   | 70  | 70  |
| Promoter NonTATA 300 bps  | 47356  | 5920  | 300 | 300 |
| Promoter TATA 300 bps     | 47356  | 5920  | 70  | 70  |
| Promoter All 300 bps      | 4904   | 613   | 300 | 300 |
| Human TFBS 1              | 32378  | 1000  | 101 | 101 |
| Human TFBS 2              | 30672  | 1000  | 101 | 101 |
| Human TFBS 3              | 19000  | 1000  | 101 | 101 |
| Human TFBS 4              | 27294  | 1000  | 101 | 101 |
| Human TFBS 5              | 19000  | 1000  | 101 | 101 |
| Enhancer ensembl          | 123872 | 30970 | 573 | 269 |
| Promoter NonTATA 251bps   | 27097  | 9034  | 251 | 251 |
| Human vs worm             | 75000  | 25000 | 200 | 200 |
| Regulatory region type    | 150000 | 57713 | 802 | 401 |
| Enhancer cohn             | 20843  | 6948  | 500 | 500 |
| Coding                    | 75000  | 25000 | 200 | 200 |
| Open chromatin region     | 139804 | 34952 | 593 | 315 |
| Covid variants            | 73335  | 9168  | 999 | 999 |
| Donors                    | 19775  | 2198  | 600 | 600 |
| Splice Site Type, DNABERT | 36496  | 4562  | 400 | 400 |
| Acceptors                 | 19961  | 2218  | 600 | 600 |
| Splice Site Type, NT      | 27000  | 3000  | 400 | 400 |
| Enhancer                  | 14968  | 400   | 200 | 199 |
| Enhancer strength         | 14968  | 400   | 200 | 199 |
| Yeast H3                  | 11971  | 1497  | 500 | 500 |
| Yeast H3K79me3            | 23069  | 2884  | 500 | 500 |
| Yeast H3K9ac              | 22224  | 2779  | 500 | 500 |
| Yeast H3K14ac             | 26438  | 3305  | 500 | 500 |
| Yeast H3K4me3             | 29439  | 3680  | 500 | 500 |
| Yeast H3K36me3            | 27904  | 3488  | 500 | 500 |
| Yeast H3K4me2             | 24545  | 3069  | 500 | 500 |
| Yeast H4                  | 11679  | 1461  | 500 | 500 |
| Yeast H3K4me1             | 25341  | 3168  | 500 | 500 |
| Yeast H4ac                | 27275  | 3410  | 500 | 500 |

Supplementary Figure 1: The radar plots showing the performance of the models on human DNA sequence classification datasets, based on 4 metrics. Due to the vast number of datasets in this category, we averaged the performance scores across datasets of similar kinds of problems. There are six kinds of problems in total: identification of enhancer region, promoter region, splice site, open chromatin region, transcription factor binding site, and coding region.

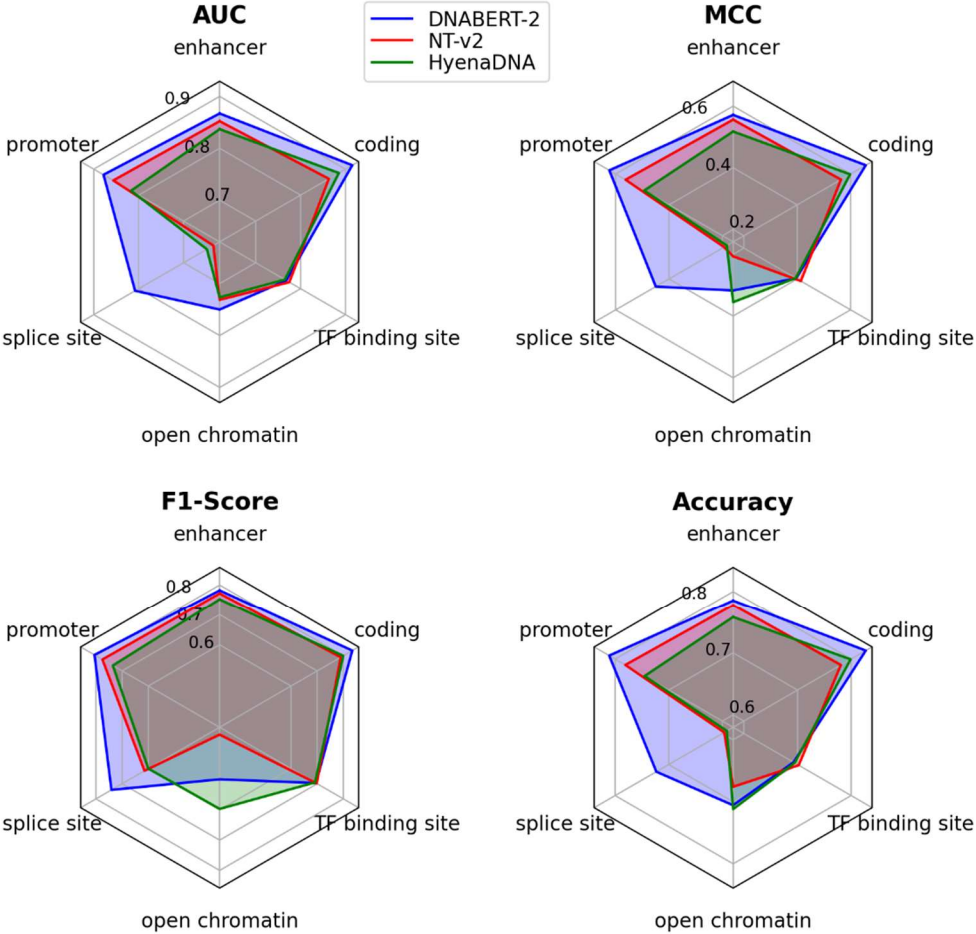

Supplementary Table 3: Comparison of AUCs of DNABERT-2, NT-v2 and HyenaDNA, all experimented using mean pooling. **\*\*DeLong Test significance < 0.01. Bolded value: DeLong Test significance < 0.05.**

| Data                          | DNABERT-2      | NT-v2          | HyenaDNA       |
|-------------------------------|----------------|----------------|----------------|
| Promoter GM12878              | 0.985          | 0.982          | 0.976          |
| Promoter HUVEC                | <b>0.99**</b>  | 0.987          | 0.982          |
| Promoter Hela-S3              | <b>0.989**</b> | 0.984          | 0.981          |
| Promoter NHEK                 | <b>0.95**</b>  | 0.933          | 0.927          |
| Promoter NonTATA 251 bps      | 0.93           | 0.89           | 0.932          |
| Promoter NonTATA 70 bps       | 0.856          | <b>0.867**</b> | 0.852          |
| Promoter TATA 70 bps          | 0.788          | <b>0.803**</b> | 0.78           |
| Promoter All 70 bps           | 0.837          | <b>0.848**</b> | 0.837          |
| Promoter NonTATA 300 bps      | 0.972          | 0.971          | 0.963          |
| Promoter TATA 300 bps         | 0.736          | 0.753          | <b>0.794**</b> |
| Promoter All 300 bps          | 0.936          | 0.939          | 0.935          |
| Coding                        | <b>0.944**</b> | 0.929          | 0.941          |
| Donor                         | <b>0.899**</b> | 0.802          | 0.804          |
| Acceptor                      | <b>0.91**</b>  | 0.815          | 0.804          |
| Enhancer                      | 0.87           | 0.865          | 0.833          |
| Enhancer Cohn                 | <b>0.822**</b> | 0.789          | 0.776          |
| Enhancer Ensembl              | 0.937          | <b>0.939**</b> | 0.936          |
| TFBS Data 1                   | 0.834          | 0.812          | 0.830          |
| TFBS Data 2                   | 0.9            | 0.883          | 0.889          |
| TFBS Data 3                   | 0.803          | 0.79           | 0.797          |
| TFBS Data 4                   | 0.724          | 0.701          | 0.731          |
| TFBS Data 5                   | 0.866          | 0.831          | 0.844          |
| Open chromatin region         | <b>0.724</b>   | 0.719          | 0.719          |
| DNase_I Hypersensitive        | 0.864          | 0.853          | 0.832          |
| Promoter B_ amyloliquefaciens | 0.851          | 0.826          | 0.862          |
| Promoter R_capsulatus         | 0.687          | 0.676          | <b>0.712**</b> |
| Promoter Arabidopsis NonTATA  | 0.946          | 0.939          | <b>0.955**</b> |
| Promoter Arabidopsis TATA     | 0.951          | 0.951          | <b>0.961**</b> |
| Human vs worm                 | <b>0.98**</b>  | 0.978          | 0.95           |
| Mouse TFBS                    | 0.801          | 0.766          | 0.726          |
| 5-methylcytosin (5mC)         | 0.69           | <b>0.723**</b> | 0.68           |
| N6-methyladenosine (6mA)      | 0.744          | <b>0.765**</b> | 0.747          |
| A.Thaliana 4mC                | 0.599          | <b>0.632**</b> | 0.593          |
| C.Elegans 4mC                 | 0.596          | <b>0.648**</b> | 0.598          |
| D.Melanogaster 4mC            | 0.614          | <b>0.652**</b> | 0.609          |
| E.Coli 4mC                    | 0.548          | 0.608          | 0.615          |
| G.Pickeringii 4mC             | 0.595          | 0.632          | 0.631          |
| G.Subterraneus 4mC            | 0.579          | 0.614          | 0.609          |
| Yeast Epigenetic Marks        | <b>0.778</b>   | 0.759          | 0.742          |

Supplementary Table 4: DNABERT-2 Mean pooling AUCs compared to CLS token pooling. *Bolded value: row maximum.*

| Data                         | Mean Pooling | CLS Token    |
|------------------------------|--------------|--------------|
| Promoter GM12878             | <b>0.985</b> | 0.964        |
| Promoter HUVEC               | <b>0.99</b>  | 0.974        |
| Promoter Hela-S3             | <b>0.989</b> | 0.971        |
| Promoter NHEK                | <b>0.95</b>  | 0.912        |
| Donors                       | <b>0.899</b> | 0.823        |
| Acceptors                    | <b>0.91</b>  | 0.793        |
| Enhancer                     | <b>0.87</b>  | 0.863        |
| Coding                       | <b>0.944</b> | 0.915        |
| Enhancer cohn                | <b>0.822</b> | 0.792        |
| Enhancer ensembl             | 0.937        | <b>0.947</b> |
| Human TFBS 1                 | <b>0.866</b> | 0.785        |
| Human TFBS 2                 | <b>0.724</b> | 0.66         |
| Human TFBS 3                 | <b>0.9</b>   | 0.834        |
| Human TFBS 4                 | <b>0.879</b> | 0.817        |
| Human TFBS 5                 | <b>0.803</b> | 0.744        |
| Promoter NonTATA 251bps      | <b>0.93</b>  | 0.861        |
| Open chromatin region        | <b>0.724</b> | 0.685        |
| Promoter NonTATA 70 bps      | <b>0.856</b> | 0.816        |
| Promoter TATA 70 bps         | 0.788        | <b>0.809</b> |
| Promoter All 70 bps          | <b>0.837</b> | 0.803        |
| Promoter NonTATA 300 bps     | <b>0.972</b> | 0.938        |
| Promoter TATA 300 bps        | <b>0.736</b> | 0.698        |
| Promoter All 300 bps         | <b>0.936</b> | 0.897        |
| Promoter B_amyloliquefaciens | 0.851        | 0.856        |
| Promoter R_capsulatus        | <b>0.687</b> | 0.661        |
| Promoter Arabidopsis_NonTATA | <b>0.946</b> | 0.891        |
| Promoter Arabidopsis_TATA    | <b>0.951</b> | 0.903        |
| Human vs worm                | <b>0.98</b>  | 0.946        |
| Mouse TFBS                   | <b>0.801</b> | 0.700        |
| 5-methylcytosin (5mC)        | <b>0.69</b>  | 0.678        |
| N6-methyladenosine (6mA)     | <b>0.744</b> | 0.731        |
| DNase_I                      | <b>0.864</b> | 0.815        |
| 4mC_A.thaliana               | <b>0.599</b> | 0.59         |
| 4mC_C.elegans                | <b>0.596</b> | 0.587        |
| 4mC_D.melanogaster           | <b>0.614</b> | 0.604        |
| 4mC_E.coli                   | 0.548        | <b>0.567</b> |
| 4mC_G.pickeringii            | <b>0.595</b> | 0.587        |
| 4mC_G.subterraneus           | 0.579        | <b>0.588</b> |
| Yeast Epigenetic Marks       | <b>0.778</b> | 0.734        |

Supplementary Table 5: NT-v2 Mean pooling AUCs compared to CLS token pooling. *Bolded value: row maximum.*

| Data                         | Mean Pooling | CLS Token    |
|------------------------------|--------------|--------------|
| Promoter GM12878             | <b>0.982</b> | 0.878        |
| Promoter HUVEC               | <b>0.987</b> | 0.912        |
| Promoter Hela-S3             | <b>0.984</b> | 0.909        |
| Promoter NHEK                | <b>0.933</b> | 0.855        |
| Donors                       | 0.802        | <b>0.636</b> |
| Acceptors                    | <b>0.815</b> | 0.632        |
| Enhancer                     | 0.865        | <b>0.879</b> |
| Coding                       | <b>0.929</b> | 0.863        |
| Enhancer cohn                | <b>0.789</b> | 0.728        |
| Enhancer ensembl             | 0.939        | <b>0.95</b>  |
| Human TFBS 1                 | <b>0.831</b> | 0.801        |
| Human TFBS 2                 | <b>0.701</b> | 0.663        |
| Human TFBS 3                 | <b>0.883</b> | 0.836        |
| Human TFBS 4                 | <b>0.856</b> | 0.824        |
| Human TFBS 5                 | <b>0.79</b>  | 0.751        |
| Promoter NonTATA 251bps      | <b>0.89</b>  | 0.834        |
| Open chromatin region        | <b>0.719</b> | 0.657        |
| Promoter NonTATA 70 bps      | <b>0.867</b> | 0.838        |
| Promoter TATA 70 bps         | 0.803        | <b>0.872</b> |
| Promoter All 70 bps          | <b>0.848</b> | 0.822        |
| Promoter NonTATA 300 bps     | <b>0.971</b> | 0.91         |
| Promoter TATA 300 bps        | <b>0.753</b> | 0.694        |
| Promoter All 300 bps         | <b>0.939</b> | 0.875        |
| Promoter B_amyloliquefaciens | <b>0.826</b> | 0.797        |
| Promoter R_capsulatus        | <b>0.676</b> | 0.668        |
| Promoter Arabidopsis_NonTATA | <b>0.939</b> | 0.85         |
| Promoter Arabidopsis_TATA    | <b>0.951</b> | 0.855        |
| Human vs worm                | <b>0.978</b> | 0.919        |
| Mouse TFBS                   | <b>0.766</b> | 0.722        |
| 5-methylcytosin (5mC)        | <b>0.723</b> | 0.713        |
| N6-methyladenosine (6mA)     | <b>0.765</b> | 0.752        |
| DNase_I                      | <b>0.853</b> | 0.806        |
| 4mC_A.thaliana               | <b>0.632</b> | 0.6          |
| 4mC_C.elegans                | <b>0.648</b> | 0.594        |
| 4mC_D.melanogaster           | <b>0.652</b> | 0.611        |
| 4mC_E.coli                   | <b>0.608</b> | 0.579        |
| 4mC_G.pickeringii            | <b>0.632</b> | 0.607        |
| 4mC_G.subterraneus           | <b>0.614</b> | 0.581        |
| Yeast Epigenetic Marks       | <b>0.759</b> | 0.643        |



Supplementary Table 6: HyenaDNA Mean pooling AUCs compared to EOS token pooling. *Bolded value: row maximum.*

| Data                         | Mean Pooling | EOS Token    |
|------------------------------|--------------|--------------|
| Promoter GM12878             | <b>0.976</b> | 0.884        |
| Promoter HUVEC               | <b>0.982</b> | 0.906        |
| Promoter Hela-S3             | <b>0.981</b> | 0.9          |
| Promoter NHEK                | <b>0.927</b> | 0.854        |
| Donors                       | <b>0.804</b> | 0.626        |
| Acceptors                    | <b>0.804</b> | 0.67         |
| Enhancer                     | <b>0.833</b> | <b>0.833</b> |
| Coding                       | <b>0.941</b> | 0.885        |
| Enhancer cohn                | <b>0.776</b> | 0.733        |
| Enhancer ensembl             | 0.936        | <b>0.944</b> |
| Human TFBS 1                 | <b>0.844</b> | 0.787        |
| Human TFBS 2                 | <b>0.731</b> | 0.624        |
| Human TFBS 3                 | <b>0.889</b> | 0.842        |
| Human TFBS 4                 | <b>0.888</b> | 0.83         |
| Human TFBS 5                 | <b>0.797</b> | 0.741        |
| Promoter NonTATA 251bps      | <b>0.932</b> | 0.853        |
| Open chromatin region        | <b>0.719</b> | 0.665        |
| Promoter NonTATA 70 bps      | <b>0.852</b> | 0.79         |
| Promoter TATA 70 bps         | <b>0.78</b>  | 0.732        |
| Promoter All 70 bps          | <b>0.837</b> | 0.769        |
| Promoter NonTATA 300 bps     | <b>0.963</b> | 0.818        |
| Promoter TATA 300 bps        | <b>0.794</b> | 0.717        |
| Promoter All 300 bps         | <b>0.935</b> | 0.797        |
| Promoter B_amyloliquefaciens | <b>0.862</b> | 0.688        |
| Promoter R_capsulatus        | <b>0.712</b> | 0.602        |
| Promoter Arabidopsis_NonTATA | <b>0.955</b> | 0.814        |
| Promoter Arabidopsis_TATA    | <b>0.961</b> | 0.82         |
| Human vs worm                | <b>0.95</b>  | 0.837        |
| Mouse TFBS                   | <b>0.624</b> | 0.726        |
| 5-methylcytosin (5mC)        | <b>0.68</b>  | 0.604        |
| N6-methyladenosine (6mA)     | <b>0.747</b> | 0.681        |
| DNase_I                      | <b>0.832</b> | 0.787        |
| 4mC_A.thaliana               | <b>0.593</b> | 0.557        |
| 4mC_C.elegans                | <b>0.598</b> | 0.583        |
| 4mC_D.melanogaster           | <b>0.609</b> | 0.57         |
| 4mC_E.coli                   | <b>0.615</b> | 0.579        |
| 4mC_G.pickeringii            | <b>0.631</b> | 0.603        |
| 4mC_G.subterraneus           | <b>0.609</b> | 0.577        |
| Yeast Epigenetic Marks       | <b>0.742</b> | 0.665        |
